# Supplementary material
Source: HighWire-hosted journal article supplement (https://bmjopen.bmj.com/content/12/5/e060405)
Supplement: inline-supplementary-material-1 [file inline-supplementary-material-1.pdf]

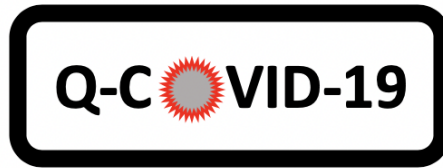

## TOPIC GUIDE: INTERVIEW WITH OLDER ADULTS

- **Participant profile**
  - Age, gender
  - Past occupation/present occupation and hobbies
  - Living situation
- **Daily routines**
  - What did a typical day look like before COVID-19?
  - What does a typical day during the COVID-19 lockdown period look like? What has changed?
- **Social network**
  - Are you part of a community/association/social group?
    - How often did you meet?
    - What was your role in this group?
  - With whom did/do you regularly keep in contact?
  - What ways of contact do you have? What different communication methods do you use now with your loved ones?
  - Many older adults express a sense of isolation during this lockdown. What is your view on that?
- **Understanding of COVID-19**
  - What are the current guidelines on COVID-19?
    - Have these shifted since the beginning of the outbreak?
  - Where do you get your information from?
  - Do you check your sources more frequently?
  - Who do you talk with the most about this?
- **Risk**
  - What is your interpretation of the term 'risk' with regards to COVID-19?
  - Who is at risk? What is risky behaviour?
  - Where do you get your information around 'risk'?
- **Decision-making**
  - When did you decide this was something serious?
  - When did you decide to self-isolate?
    - What does this look like for you?
    - What are the challenges of doing this?
    - How has this self-isolation and physical distancing affected your social networks (i.e. community groups, friends, family, caregivers)

- Do you regularly get phone calls from family/friends? Has this always been the case, or has it changed since COVID-19?
- **Vulnerability**
  - What do you think of the guidelines calling for older adults over 70 to self-isolate?
  - Do you feel 'vulnerable' – a term used by the UK government?
  - What are your views about the media reporting around COVID-19? What about the portrayal of risk attributed to older people?
  - Do you feel this accurately describes you and your peers?
- **Topics important to the participant**
  - Which topics have we not covered that are important around COVID-19?
- **Is there anything else you would like to add?**
